# 1 First study on surveillance of SARS-CoV-2 RNA in wastewater systems and 2 related environments in Wuhan: Post-lockdown

3 Lu Zhao<sup>1,2,#</sup>, Evans Atoni<sup>1,2,#</sup>, Yao Du<sup>3</sup>, Huaiyu Zhang<sup>4</sup>, Oscar Donde<sup>5</sup>, Doudou Huang<sup>1</sup>, Shuqi Xiao<sup>1</sup>, Teng  
4 Ma<sup>3</sup>, Zhu Shu<sup>3</sup>, Zhiming Yuan<sup>1,2,\*</sup>, Lei Tong<sup>3,\*</sup>, Han Xia<sup>1,2,\*</sup>

5 1. Key Laboratory of Special Pathogens and Biosafety, Wuhan Institute of Virology, Center for Biosafety Mega-  
6 Science, Chinese Academy of Sciences, Wuhan 430071, China

7 2. University of Chinese Academy of Sciences, Beijing 100049, China

8 3. School of Environmental Studies, China University of Geosciences (Wuhan), Wuhan, 430074, China

9 4. Central and Southern China Municipal Design & Research Institute Co., Ltd., Wuhan, 430010, China

10 5. Department of Environmental Science, Egerton University, P. O. Box 536-20115, Egerton, Kenya

11  
12 #These authors contributed equally to this work

13 Correspondence author: Zhiming Yuan (Email: [yzm@wh.iov.cn](mailto:yzm@wh.iov.cn)), Lei Tong ([tonglei@cug.edu.cn](mailto:tonglei@cug.edu.cn)), Han Xia  
14 ([hanxia@wh.iov.cn](mailto:hanxia@wh.iov.cn))

## 16 Abstract

17 Wastewater-based epidemiology (WBE) has emerged as an effective environmental surveillance tool in  
18 monitoring fecal-oral pathogen infections within a community. Congruently, SARS-CoV-2 virus, the etiologic  
19 agent of COVID-19, has been demonstrated to infect the gastrointestinal tissues, and be shed in feces. In the  
20 present study, SARS-CoV-2 RNA was concentrated from wastewater, sludge, surface water, ground water, and  
21 soil samples of municipal and hospital wastewater systems and related environment in Wuhan during the  
22 COVID-19 middle and low risk periods, and the viral RNA copies quantified using RT-qPCR. From the findings  
23 of this study, during the middle risk period, one influent sample and three secondary treatment effluents  
24 collected from Waste Water Treatment Plant 2 (WWTP2), as well as two influent samples from wastewater  
25 system of Hospital 2 were SARS-CoV-2 RNA positive. One sludge sample collected from Hospital 4; which was  
26 obtained during low risk period, was positive for SARS-CoV-2 RNA. These study findings demonstrate the  
27 significance of WBE in continuous surveilling and monitoring of SARS-CoV-2 at the community level, even  
28 when the COVID19 prevalence is low. Therefore, the application of WBE is principally useful in tracking the  
29 level of infections in communities and the risk assessment of the secondary environment.

## 31 **Letter/Short report**

32 Severe Acute Respiratory Syndrome Coronavirus 2 (SARS-CoV-2) is the causative agent for coronavirus disease  
33 COVID-19, a current public health crisis of global concern (Zhou et al. 2020). COVID-19 was declared a  
34 pandemic by World Health Organization (WHO) on 11<sup>th</sup> March 2020 (Cucinotta and Vanelli 2020), after its first  
35 report in Wuhan to other cities in China and thereafter spread to many other countries. COVID-19 is primarily  
36 transmitted via respiratory droplets that people cough, sneeze or exhale, and may also be spread via fomites  
37 (Jayaweera et al. 2020; Wang and Du 2020). Moreover, current efforts in the mitigation and prevention of the  
38 spread and transmission of SARS-CoV-2 virus has been focused in adoption of non-pharmacological  
39 intervention strategies.

40 In recent times, the assessment of different substances in wastewater has offered vital qualitative or  
41 quantitative knowledge on certain populations in a given wastewater catchment, particularly on the drug  
42 usage and distribution of drug resistant pathogenic genes within the environment. Moreover, this developing  
43 potential application has been propositioned for probable adoption in the field of infectious diseases to track  
44 and understand the distribution of disease bio-markers (Choi et al. 2018). Overtime, microbiologists have  
45 investigated pathogens in sewerage and wastewater systems, as a public health surveillance tool known as  
46 wastewater-based epidemiology (Daughton 2018; Sinclair et al. 2008; Xagorarakis and O'Brien 2020).  
47 Wastewater-based epidemiology (WBE) has been applied in surveillance of numerous fecal-oral viruses,  
48 foodborne and waterborne pathogens that infected persons typically excrete in high concentration (Bisseux et  
49 al. 2018; Iaconelli et al. 2017; Katayama et al. 2008). WBE has been applied in investigating other viruses  
50 beyond enteric fecal oral route, since viral shedding involves different body fluids ultimately discharged into  
51 the sewage systems (La Rosa et al. 2020).

52 Therefore, in sight of this global COVID-19 pandemic, scientists from various parts of the world have applied  
53 this surveillance system in detecting SARS-CoV-2 RNA particles in wastewater systems (Chavarria-Miró et al.  
54 2020; Haramoto et al. 2020; Kocameki et al. 2020; Rimoldi et al. 2020; La Rosa et al. 2020). Additionally, in  
55 China, a team of scientists from Tongji University investigated the presence of SARS-CoV-2 virus in wastewater  
56 discharged from designate hospitals, municipal networks, and downstream in fluent into a sewage plant in  
57 Shanghai. In their study findings, SARS-CoV-2 RNA positive samples were detected from wastewater  
58 discharges of the designate hospitals (<http://www.water8848.com/news/202003/30/123415.html>).

59 Due to the outbreak of SARS-CoV-2 in Wuhan, stringent quarantine measures were enforced throughout the  
60 city on January 23, 2020 by the local Hubei government. After 11 weeks of lockdown, traffic control measures  
61 begun to be officially lifted on April 8, and life started getting back to normal. As of 7<sup>th</sup> April, there were 574  
62 confirmed cases and 673 cases under medical surveillance in Wuhan (<http://wjw.wuhan.gov.cn/sy/>). Indeed,

63 Hubei Centre for Disease Control and Prevention reviewed the emergency response level for COVID-19 in  
64 Wuhan, and it was lowered from high to medium risk on 25<sup>th</sup> March 2020, and thereafter lowered it from  
65 medium to low risk on 8<sup>th</sup> April. Currently there is no published report on tracking of SARS-CoV-2 in  
66 wastewater and related environment in Wuhan during the epidemic or after the epidemic.

67 In the present study, a total of 216 samples that covered middle and low risk periods were collected from  
68 various points including wastewater treatment plants, designated hospitals for COVID-19, lake and river that  
69 are close to the COVID-19 designated hospitals, between the months of April and May, 2020. Except for the  
70 ground water samples, the collection sites were mainly distributed in two districts; with the first one being  
71 around Hospital 1-Wastewater treatment plant 1 (WWTP1) in Hongshan district, and the other one being  
72 around Hospital 2-Wastewater treatment plant 2 (WWTP2) in Dongxihu district (Figure 1). The samples were  
73 transported to the laboratory on ice and processed within 6 h of collection. Raw samples were first  
74 centrifuged to remove the debris. Viral particles were concentrated by Polyethylene glycol 8000 (8% w/v,  
75 Millipore Sigma) and 0.9 g NaCl (0.3 M, Millipore Sigma), and precipitation done from 40mL supernatant to  
76 1mL. Viral genomes were extracted from 200  $\mu$ l concentrated samples by using Direct-zol RNA Kit  
77 (Zymoresearch), followed by qRT-PCR (NEB) with two primer and probe pairs (RBD2 and ORF1) targeting the  
78 RBD and ORF1 genes. Quantification was performed using a standard curve based on the 10-fold dilutions of  
79 RNA extracted from SARS-CoV-2 infected VeroE6 culture.

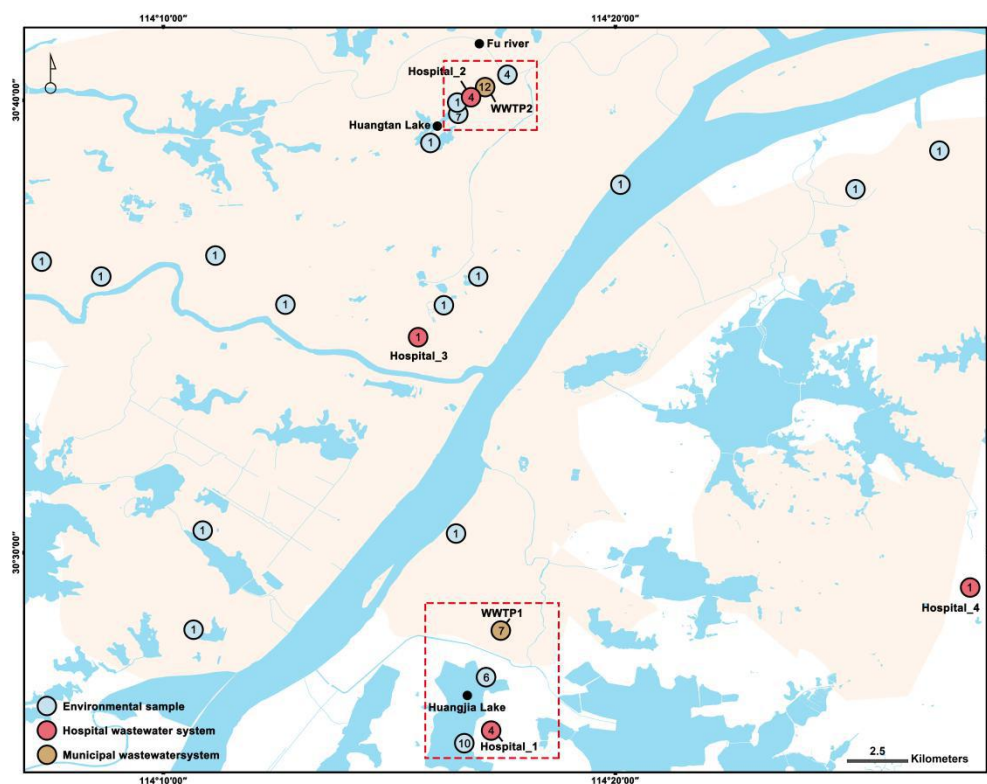

81 **Figure 1. Map of the study area in Wuhan.** The number within the circle points stands for the number of  
 82 sampling sites.

83 From the findings of this study, during the middle risk period, positive samples were detected both in  
 84 municipal and hospital wastewater systems. One of the three influent samples ( $7.4 \times 10^3$  copies/L), three of  
 85 six secondary treatment effluents ( $5.3 \times 10^3$  and  $1.0 \times 10^4$  copies/L) of WWTP2, and two samples from  
 86 wastewater system influents ( $3.8 \times 10^3$  and  $9.3 \times 10^3$  copies/L) from Hospital 2 were determined as SARS-CoV-  
 87 2 RNA positive. During the low risk period, only one positive sludge sample ( $1.4 \times 10^4$  copies/L) was detected  
 88 in wastewater system handling wastes from Hospital 4 designated for COVID-19 patients. This was consistent  
 89 with the COVID-19 risk level in Wuhan at the time. Subsequently, attempted viral isolation for all the positive  
 90 samples was not successful. Further, all of the tested surface and ground waters, lake sediments, and soil  
 91 samples were SARS-CoV-2 RNA negative in both the middle and low risk periods. This illustrates the positive  
 92 effect of the stringent epidemiological containment measures that had been implemented in Wuhan, during  
 93 the high and middle risk phases.

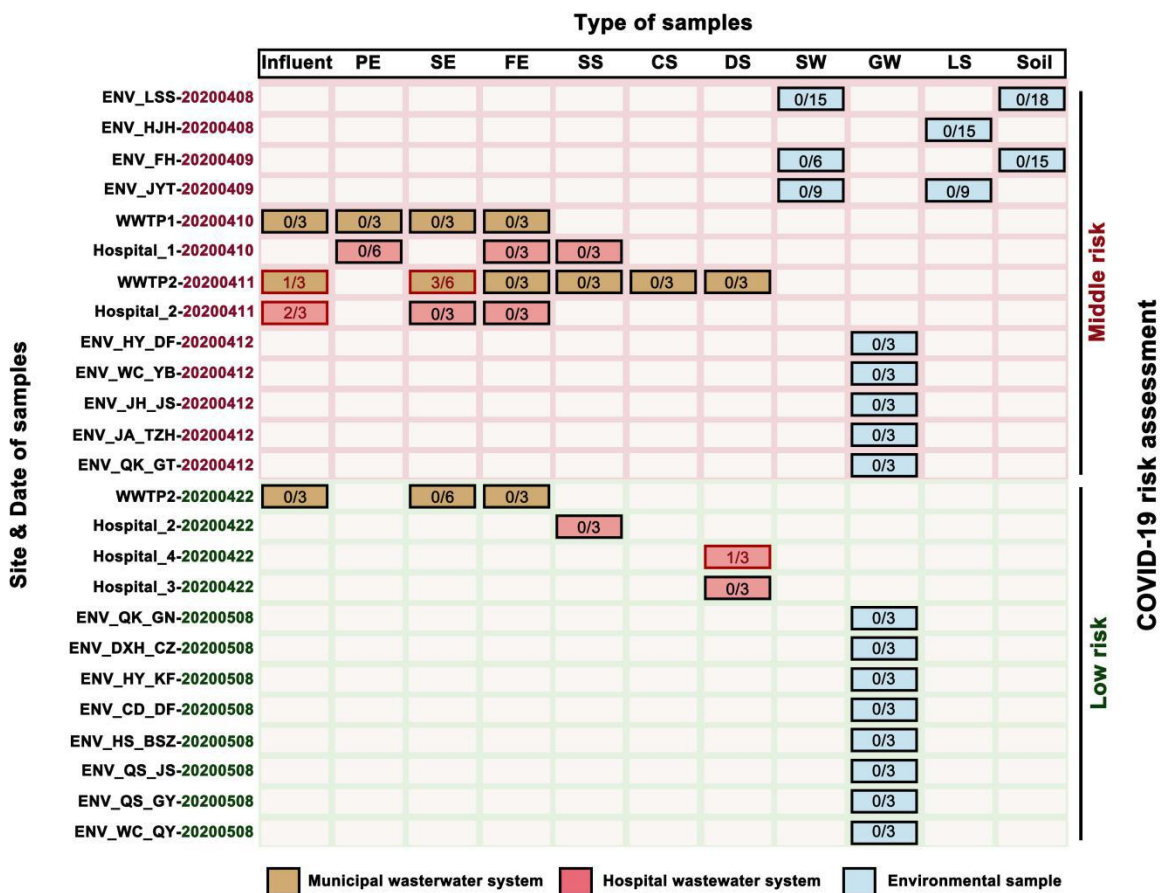

95 **Figure 2. A summary of results for all the tested samples.** The numbers in block stand for the number of  
96 positive sample over the total number of tested samples.

97 Since the first detection of SARS-CoV-2 in faeces (Zhang et al. 2020), it became clear that human wastewater  
98 might contain the novel coronavirus. Hence, WBE of SARS-CoV-2 is crucial because it has been suggested that  
99 aerosolization of virus-containing faces might pose a threat in its spread and transmission (Fan Wu et al.  
100 2020). However, whether SARS-CoV-2 is viable under environmental conditions that could facilitate fecal–oral  
101 transmission is not yet clear (Lodder and de Roda Husman 2020). Moreover, evidence exists of potential  
102 community spread, with the virus spreading easily and sustainably in the community in some affected  
103 geographic areas, including China.

104 Based on recently conducted studies, SARS-CoV-2 RNA has been detected worldwide in influent waters  
105 (Ahmed et al. 2020; Lodder and de Roda Husman 2020; Medema et al. 2020; La Rosa et al. 2020; Fuqing Wu  
106 et al. 2020), treated wastewater in Paris, France (Wurtzer et al. 2020) and sludge from wastewater treatment  
107 Plants (Kocamemi et al. 2020). Therefore, this study findings from Wuhan city are in conformity with these  
108 previously conducted studies.

109 Although SARS-CoV-2 RNA surveillance in wastewaters is a useful WBE drive, the public health risk associated  
110 with water cycle is unclear since viral particles infectivity in sewage and faeces is yet to be determined in  
111 addition to its probable fecal-oral transmission. Indeed, a recently conducted study has inferred that risk of  
112 infection from wastewater and river is insignificant due to the low success rate in cell culture of SARS-CoV-2  
113 from water samples in spite of the high RNA copies (Rimoldi et al. 2020).

114 Certainly, the findings of this present study offer proof on the sensitivity and probable reliability of  
115 environmental surveillance in the detection of emerging disease outbreaks in the population. The sampling  
116 was done in late April, when the COVID-19 epidemic was reducing in Wuhan, post-lockdown and massive  
117 epidemiological containment measures had been implemented prior. Therefore, the detection of SARS-CoV-2  
118 viral RNA in the tested samples is not surprising because the samples were collected from two hospitals and a  
119 wastewater treatment plant, points to the sensitivity of WBE in tracking the pathogen and the need for its  
120 adoption in pathogen detection, even under low prevalence record of human illnesses. This phenomenon, in  
121 which virus can be detected in sewage in spite of the low prevalence record of human illnesses, might be  
122 linked with the capability of wastewater-based surveillance to estimate after thorough epidemiological  
123 models, mild, subclinical, or asymptomatic cases (La Rosa et al. 2020). These infected individuals shed viruses  
124 into local sewage systems and contribute to virus circulation while remaining substantially undetectable by  
125 clinical surveillance, a phenomenon known as the “surveillance pyramid” (Martínez Wassaf et al. 2014).

126 However, one limitation of this study was that data for the high-risk period was lacking. This was because  
127 surveillance and detection of SARS-CoV-2 was a prime priority due to the peak in COVID-19 infection in  
128 Wuhan. Moreover, there was no regulation that guided WWTP on periodic collection and storage of water  
129 samples over a period of time.

130 In conclusion, the detection of SARS-CoV-2 RNA in various wastewater systems and related environmental  
131 samples in Wuhan shows the significance of WBE in continuous surveilling and monitoring SARS-CoV-2 at the  
132 community level, under low prevalence record of human illnesses, in contrast to clinical surveillance. This  
133 application is principally useful in remote communities and confined populations where mass sampling for  
134 the entire population may not be easily achievable at the onset due to inadequate resources or occurrence of  
135 asymptomatic patients, though effective sampling techniques is of great essence for achieving accurate  
136 results.

### 137 **Acknowledgment**

138 We sincerely thank Prof. Hongping Wei and the entire team at the National Biosafety Laboratory in Wuhan,  
139 China for the support they extended to us. This work was supported by the Wuhan Bureau of Science and  
140 Technology (202002020101010022).

### 141 **Conflict of interest**

142 The authors declare no conflict of interest.

143

## 144 REFERENCES

- 145 Ahmed, Warish et al. 2020. "First Confirmed Detection of SARS-CoV-2 in Untreated Wastewater in Australia: A  
146 Proof of Concept for the Wastewater Surveillance of COVID-19 in the Community." *Science of the Total*  
147 *Environment* 728: 138764. /pmc/articles/PMC7165106/?report=abstract (July 18, 2020).
- 148 Bisseux, Maxime et al. 2018. "Monitoring Human Enteric Viruses in Wastewater and Relevance to Infections  
149 Encountered in the Clinical Setting: A One-Year Experiment in Central France, 2014 to 2015." *Eurosurveillance*  
150 23(7). /pmc/articles/PMC5824128/?report=abstract (July 13, 2020).
- 151 Chavarria-Miró, Gemma et al. 2020. "Sentinel Surveillance of SARS-CoV-2 in Wastewater Anticipates the  
152 Occurrence of COVID-19 Cases." *medRxiv*: 2020.06.13.20129627.  
153 <https://www.medrxiv.org/content/10.1101/2020.06.13.20129627v1> (July 2, 2020).
- 154 Choi, Phil M. et al. 2018. "Wastewater-Based Epidemiology Biomarkers: Past, Present and Future." *TrAC - Trends in*  
155 *Analytical Chemistry* 105: 453–69.
- 156 Cucinotta, Domenico, and Maurizio Vanelli. 2020. "WHO Declares COVID-19 a Pandemic." *Acta Biomedica* 91(1):  
157 157–60. <https://pubmed.ncbi.nlm.nih.gov/32191675/> (July 21, 2020).
- 158 Daughton, Christian G. 2018. "Monitoring Wastewater for Assessing Community Health: Sewage Chemical-  
159 Information Mining (SCIM)." *Science of the Total Environment* 619–620: 748–64.  
160 /pmc/articles/PMC6091531/?report=abstract (July 13, 2020).
- 161 Haramoto, Eiji, Bikash Malla, Ocean Thakali, and Masaaki Kitajima. 2020. "First Environmental Surveillance for the  
162 Presence of SARS-CoV-2 RNA in Wastewater and River Water in Japan." *medRxiv*: 2020.06.04.20122747.  
163 <http://medrxiv.org/content/early/2020/06/07/2020.06.04.20122747.abstract> (July 2, 2020).
- 164 Iaconelli, M. et al. 2017. "One-Year Surveillance of Human Enteric Viruses in Raw and Treated Wastewaters,  
165 Downstream River Waters, and Drinking Waters." *Food and Environmental Virology* 9(1): 79–88.  
166 <https://pubmed.ncbi.nlm.nih.gov/27682315/> (July 13, 2020).
- 167 Jayaweera, Mahesh, Hasini Perera, Buddhika Gunawardana, and Jagath Manatunge. 2020. "Transmission of COVID-  
168 19 Virus by Droplets and Aerosols: A Critical Review on the Unresolved Dichotomy." *Environmental Research*  
169 188: 109819. /pmc/articles/PMC7293495/?report=abstract (July 21, 2020).
- 170 Katayama, Hiroyuki et al. 2008. "One-Year Monthly Quantitative Survey of Noroviruses, Enteroviruses, and  
171 Adenoviruses in Wastewater Collected from Six Plants in Japan." *Water Research* 42(6–7): 1441–48.  
172 <https://pubmed.ncbi.nlm.nih.gov/17996920/> (July 13, 2020).
- 173 Kocamemi, Bilge Alpaslan et al. 2020. "SARS-CoV-2 Detection in Istanbul Wastewater Treatment Plant Sludges."

- 174 *medRxiv* (7): 2020.05.12.20099358. <https://doi.org/10.1101/2020.05.12.20099358> (July 18, 2020).
- 175 Lodder, Willemijn, and Ana Maria de Roda Husman. 2020. "SARS-CoV-2 in Wastewater: Potential Health Risk, but  
176 Also Data Source." *The Lancet Gastroenterology and Hepatology* 5(6): 533–34.  
177 <https://www.ncbi.nlm.nih.gov/pmc/articles/PMC7225404/> (July 18, 2020).
- 178 Martínez Wassaf, Maribel G. et al. 2014. "First Detection of Hepatitis E Virus in Central Argentina: Environmental  
179 and Serological Survey." *Journal of Clinical Virology* 61(3): 334–39.  
180 <https://pubmed.ncbi.nlm.nih.gov/25213209/> (July 21, 2020).
- 181 Medema, Gertjan et al. 2020. "Presence of SARS-Coronavirus-2 in Sewage." *medRxiv*: 2020.03.29.20045880.  
182 <https://www.medrxiv.org/content/10.1101/2020.03.29.20045880v1> (July 2, 2020).
- 183 Rimoldi, Sara Giordana et al. 2020. "Presence and Vitality of SARS-CoV-2 Virus in Wastewaters and Rivers." *medRxiv*:  
184 2020.05.01.20086009. <https://www.medrxiv.org/content/10.1101/2020.05.01.20086009v1> (July 18, 2020).
- 185 La Rosa, Giuseppina et al. 2020. "First Detection of SARS-CoV-2 in Untreated Wastewaters in Italy." *Science of the*  
186 *Total Environment* 736: 139652. [/pmc/articles/PMC7245320/?report=abstract](https://www.ncbi.nlm.nih.gov/pmc/articles/PMC7245320/?report=abstract) (July 13, 2020).
- 187 Sinclair, Ryan G., Christopher Y. Choi, Mark R. Riley, and Charles P. Gerba. 2008. "Chapter 9 Pathogen Surveillance  
188 Through Monitoring of Sewer Systems." In *Advances in Applied Microbiology*, Academic Press Inc., 249–69.  
189 <https://www.ncbi.nlm.nih.gov/pmc/articles/PMC7112011/> (July 13, 2020).
- 190 Wang, Juan, and Guoqiang Du. 2020. "COVID-19 May Transmit through Aerosol." *Irish Journal of Medical Science*: 1.  
191 <https://www.ncbi.nlm.nih.gov/pmc/articles/PMC7094991/> (July 21, 2020).
- 192 Wu, Fan et al. 2020. "A New Coronavirus Associated with Human Respiratory Disease in China." *Nature* 579(7798):  
193 265–69.
- 194 Wu, Fuqing et al. 2020. "SARS-CoV-2 Titers in Wastewater Are Higher than Expected from Clinically Confirmed  
195 Cases." *medRxiv*: 2020.04.05.20051540.  
196 <http://medrxiv.org/content/early/2020/04/07/2020.04.05.20051540.abstract> (July 2, 2020).
- 197 Wurtzer, Sebastien et al. 2020. "Evaluation of Lockdown Impact on SARS-CoV-2 Dynamics through Viral Genome  
198 Quantification in Paris Wastewaters." *medRxiv*: 2020.04.12.20062679.  
199 <http://medrxiv.org/content/early/2020/05/06/2020.04.12.20062679.abstract> (July 18, 2020).
- 200 Xagorarakis, Irene, and Evan O'Brien. 2020. "Wastewater-Based Epidemiology for Early Detection of Viral  
201 Outbreaks." In *Women in Water Quality*, Nature Publishing Group, 75–97.  
202 [/pmc/articles/PMC7123508/?report=abstract](https://www.ncbi.nlm.nih.gov/pmc/articles/PMC7123508/?report=abstract) (July 13, 2020).
- 203 Zhang, Wei et al. 2020. "Molecular and Serological Investigation of 2019-NCoV Infected Patients: Implication of



204 Multiple Shedding Routes.” *Emerging Microbes and Infections* 9(1): 386–89.

205 <https://www.tandfonline.com/doi/full/10.1080/22221751.2020.1729071> (July 19, 2020).

206 Zhou, Peng et al. 2020. “A Pneumonia Outbreak Associated with a New Coronavirus of Probable Bat Origin.” *Nature*

207 579(7798): 270–73.

208
